# Supplementary material for: Ascorbic acid accelerates Wallerian degeneration after peripheral nerve injury
Source: PubMed Central journal article supplement — Neural Regen Res. 2020 Nov 27;16(6):1078–85. doi: 10.4103/1673-5374.300459 (PMC8224114; doi:10.4103/1673-5374.300459), 2020-11-27
Supplement: NRR-16-1078_Suppl1.pdf [file NRR-16-1078_Suppl1.pdf]

Figure 1

| Figure 1-P                                |           |           |
|-------------------------------------------|-----------|-----------|
| Axonal Segment Length(5 dpi)-Frequency(%) |           |           |
| Axonal Sd                                 | Saline    | AA        |
| 0                                         | 0         | 0         |
| 5                                         | 0         | 0         |
| 10                                        | 4.571429  | 18.28572  |
| 15                                        | 18.85714  | 32.57143  |
| 20                                        | 23.42857  | 28.57143  |
| 25                                        | 16.57143  | 9.714286  |
| 30                                        | 11.42857  | 6.285714  |
| 35                                        | 10.28571  | 2.857143  |
| 40                                        | 7.428571  | 1.142857  |
| 45                                        | 4.571429  | 0.5714286 |
| 50                                        | 2.285714  | 0         |
| 55                                        | 0.5714286 | 0         |

| Figure 1-P                       |        |  |
|----------------------------------|--------|--|
| Axonal Segment Length(5 dpi)(µm) |        |  |
| Saline                           | AA     |  |
| 6.338                            | 6.056  |  |
| 7.137                            | 6.242  |  |
| 8.138                            | 6.384  |  |
| 8.46                             | 6.561  |  |
| 8.579                            | 6.638  |  |
| 8.814                            | 6.733  |  |
| 9.028                            | 7.137  |  |
| 9.642                            | 7.348  |  |
| 10.503                           | 7.503  |  |
| 10.093                           | 7.57   |  |
| 10.106                           | 7.587  |  |
| 10.144                           | 7.899  |  |
| 10.206                           | 7.98   |  |
| 10.836                           | 7.98   |  |
| 11.103                           | 7.98   |  |
| 11.103                           | 7.98   |  |
| 11.103                           | 8.075  |  |
| 11.285                           | 8.215  |  |
| 11.285                           | 8.354  |  |
| 11.285                           | 8.579  |  |
| 11.285                           | 8.579  |  |
| 11.782                           | 8.579  |  |
| 11.996                           | 8.579  |  |
| 12.112                           | 8.579  |  |
| 12.112                           | 8.624  |  |
| 12.196                           | 8.683  |  |
| 12.206                           | 8.814  |  |
| 12.206                           | 9.589  |  |
| 12.279                           | 9.602  |  |
| 12.372                           | 9.602  |  |
| 12.372                           | 9.708  |  |
| 12.657                           | 9.708  |  |
| 12.657                           | 9.915  |  |
| 12.867                           | 10.093 |  |
| 13.121                           | 10.093 |  |
| 13.121                           | 10.106 |  |
| 13.121                           | 10.156 |  |
| 13.121                           | 10.206 |  |
| 13.131                           | 10.598 |  |
| 13.276                           | 10.61  |  |
| 13.626                           | 10.706 |  |
| 13.636                           | 10.789 |  |
| 13.71                            | 11.206 |  |
| 14.131                           | 11.285 |  |
| 14.14                            | 11.508 |  |
| 14.212                           | 11.519 |  |
| 14.636                           | 11.607 |  |
| 14.636                           | 11.618 |  |
| 14.67                            | 11.706 |  |
| 14.945                           | 11.706 |  |
| 15.149                           | 11.996 |  |
| 15.174                           | 12.112 |  |
| 15.547                           | 12.112 |  |
| 15.547                           | 12.154 |  |
| 15.645                           | 12.936 |  |
| 15.653                           | 12.975 |  |
| 15.718                           | 12.975 |  |
| 15.847                           | 13.121 |  |
| 16.031                           | 13.121 |  |
| 16.15                            | 13.121 |  |
| 16.181                           | 13.181 |  |
| 16.306                           | 13.276 |  |
| 16.654                           | 13.362 |  |
| 16.685                           | 13.438 |  |
| 16.844                           | 13.589 |  |
| 17.166                           | 13.626 |  |
| 17.166                           | 13.636 |  |
| 17.189                           | 13.858 |  |
| 17.226                           | 13.985 |  |
| 17.271                           | 14.131 |  |
| 17.779                           | 14.131 |  |
| 18.175                           | 14.14  |  |
| 18.196                           | 14.14  |  |
| 18.673                           | 14.14  |  |
| 18.7                             | 14.248 |  |
| 18.7                             | 14.452 |  |
| 18.782                           | 14.636 |  |
| 18.917                           | 14.644 |  |
| 19.104                           | 14.67  |  |
| 19.204                           | 14.696 |  |
| 19.682                           | 14.714 |  |
| 19.785                           | 14.774 |  |
| 19.965                           | 14.851 |  |
| 20.092                           | 15.14  |  |
| 20.187                           | 15.174 |  |
| 20.193                           | 15.174 |  |
| 20.413                           | 15.216 |  |
| 20.543                           | 15.216 |  |
| 20.79                            | 15.274 |  |
| 21.184                           | 15.349 |  |
| 21.196                           | 15.349 |  |
| 21.346                           | 15.448 |  |
| 21.489                           | 15.547 |  |
| 21.701                           | 15.645 |  |
| 21.701                           | 15.645 |  |
| 21.701                           | 15.669 |  |
| 21.701                           | 15.677 |  |
| 21.795                           | 15.775 |  |
| 22.211                           | 15.775 |  |
| 22.229                           | 15.847 |  |
| 22.297                           | 16.15  |  |
| 22.349                           | 16.345 |  |
| 22.4                             | 16.501 |  |
| 23.017                           | 16.654 |  |
| 23.22                            | 16.654 |  |
| 23.264                           | 16.662 |  |
| 23.655                           | 16.708 |  |
| 23.768                           | 17.025 |  |
| 24.23                            | 17.137 |  |
| 24.481                           | 17.159 |  |
| 24.646                           | 17.159 |  |
| 24.75                            | 17.189 |  |
| 25.234                           | 17.226 |  |
| 25.639                           | 17.277 |  |
| 25.639                           | 17.402 |  |
| 26.243                           | 17.424 |  |
| 26.287                           | 17.656 |  |
| 26.33                            | 17.721 |  |
| 26.417                           | 17.843 |  |
| 26.79                            | 17.886 |  |
| 26.824                           | 18.168 |  |
| 26.824                           | 18.231 |  |
| 26.866                           | 18.238 |  |
| 26.919                           | 18.238 |  |
| 26.98                            | 18.37  |  |
| 27.252                           | 18.673 |  |
| 27.271                           | 18.727 |  |
| 27.55                            | 18.727 |  |
| 27.628                           | 18.843 |  |
| 28.262                           | 19.004 |  |
| 29.814                           | 19.004 |  |
| 29.844                           | 19.024 |  |
| 30.348                           | 19.104 |  |
| 30.385                           | 19.178 |  |
| 30.486                           | 19.178 |  |
| 31.326                           | 19.481 |  |
| 31.798                           | 19.682 |  |
| 32.303                           | 19.74  |  |
| 32.315                           | 19.785 |  |

| Figure1-Q                                 |           |           |   |
|-------------------------------------------|-----------|-----------|---|
| Myelin Segment Length(5 dpi)-Frequency(%) |           |           |   |
| Myelin S                                  | Saline    | AA        |   |
| 0                                         | 0         | 0         | 0 |
| 5                                         | 0         | 0         | 0 |
| 10                                        | 1.530612  | 6.730769  |   |
| 15                                        | 4.591837  | 14.42308  |   |
| 20                                        | 13.26531  | 17.30769  |   |
| 25                                        | 17.34694  | 22.11539  |   |
| 30                                        | 21.93878  | 16.82692  |   |
| 35                                        | 13.77551  | 11.05769  |   |
| 40                                        | 9.183674  | 5.769231  |   |
| 45                                        | 7.142857  | 2.884615  |   |
| 50                                        | 3.061224  | 1.442308  |   |
| 55                                        | 3.061224  | 0.9615384 |   |
| 60                                        | 2.55102   | 0.4807692 |   |
| 65                                        | 2.040816  |           |   |
| 70                                        | 0.5102041 |           |   |

| Figure 1-Q                       |        |  |
|----------------------------------|--------|--|
| Myelin Segment Length(5 dpi)(µm) |        |  |
| Saline                           | AA     |  |
| 23.655                           | 18.508 |  |
| 23.912                           | 18.688 |  |
| 24.151                           | 18.856 |  |
| 24.23                            | 19.184 |  |
| 24.272                           | 19.204 |  |
| 24.729                           | 19.204 |  |
| 25.234                           | 19.237 |  |
| 25.234                           | 19.294 |  |
| 25.254                           | 19.343 |  |
| 25.279                           | 19.598 |  |
| 25.555                           | 19.682 |  |
| 25.555                           | 19.83  |  |
| 25.743                           | 19.843 |  |
| 25.758                           | 20.244 |  |
| 25.98                            | 20.288 |  |
| 26.228                           | 20.319 |  |
| 26.243                           | 20.344 |  |
| 26.243                           | 20.344 |  |
| 26.248                           | 20.845 |  |
| 26.262                           | 20.912 |  |
| 26.287                           | 21.196 |  |
| 26.364                           | 21.226 |  |
| 26.552                           | 21.25  |  |
| 26.767                           | 21.25  |  |
| 26.79                            | 21.25  |  |
| 27.252                           | 21.577 |  |
| 27.257                           | 21.677 |  |
| 27.628                           | 21.707 |  |
| 27.628                           | 21.707 |  |
| 27.762                           | 21.865 |  |
| 27.771                           | 21.911 |  |
| 27.798                           | 22.206 |  |
| 28.09                            | 22.211 |  |
| 28.262                           | 22.211 |  |
| 28.266                           | 22.287 |  |
| 28.482                           | 22.349 |  |
| 28.482                           | 22.665 |  |
| 28.802                           | 22.733 |  |
| 28.806                           | 22.8   |  |
| 28.806                           | 22.85  |  |
| 28.837                           | 22.889 |  |
| 28.925                           | 22.983 |  |
| 29.297                           | 22.983 |  |
| 29.427                           | 23.017 |  |
| 29.483                           | 23.066 |  |
| 29.505                           | 23.215 |  |
| 29.548                           | 23.303 |  |
| 29.793                           | 23.563 |  |
| 29.929                           | 23.72  |  |
| 30.048                           | 23.725 |  |
| 30.28                            | 23.757 |  |
| 30.364                           | 23.788 |  |
| 30.785                           | 24.224 |  |
| 30.822                           | 24.224 |  |
| 31.29                            | 24.266 |  |
| 31.326                           | 24.413 |  |
| 31.549                           | 24.481 |  |
| 31.549                           | 24.481 |  |
| 32.275                           | 24.734 |  |
| 32.299                           | 25.46  |  |
| 32.299                           | 25.48  |  |
| 32.303                           | 25.743 |  |
| 32.773                           | 25.817 |  |
| 33.27                            | 25.862 |  |
| 33.312                           | 25.862 |  |
| 33.343                           | 26.053 |  |
| 33.817                           | 26.262 |  |
| 33.847                           | 26.321 |  |
| 33.873                           | 26.345 |  |
| 34.318                           | 26.523 |  |
| 34.351                           | 26.748 |  |
| 34.377                           | 26.79  |  |
| 34.451                           | 26.824 |  |
| 34.554                           | 27.257 |  |
| 34.914                           | 27.257 |  |
| 34.914                           | 27.271 |  |
| 35.001                           | 27.389 |  |
| 35.056                           | 27.457 |  |
| 35.557                           | 27.665 |  |
| 35.864                           | 27.716 |  |
| 36.522                           | 27.762 |  |
| 36.841                           | 28.153 |  |
| 36.872                           | 28.235 |  |
| 37.336                           | 28.266 |  |
| 37.349                           | 28.374 |  |
| 37.513                           | 28.549 |  |
| 37.563                           | 28.802 |  |
| 38.105                           | 29.048 |  |
| 38.355                           | 29.535 |  |
| 39.368                           | 29.621 |  |
| 39.445                           | 29.703 |  |
| 39.828                           | 29.746 |  |
| 39.898                           | 29.79  |  |
| 39.92                            | 29.862 |  |
| 40.326                           | 30.28  |  |
| 40.377                           | 30.548 |  |
| 40.386                           | 30.822 |  |
| 40.386                           | 31.094 |  |
| 40.402                           | 31.118 |  |
| 40.754                           | 31.391 |  |
| 40.879                           | 31.794 |  |
| 41.888                           | 31.798 |  |
| 42.133                           | 31.798 |  |
| 42.909                           | 32.192 |  |
| 42.945                           | 32.492 |  |
| 43.909                           | 32.862 |  |
| 43.909                           | 32.866 |  |
| 44.414                           | 32.901 |  |
| 45.018                           | 33.051 |  |
| 45.018                           | 33.343 |  |
| 45.423                           | 33.446 |  |
| 46.433                           | 33.453 |  |
| 47.463                           | 33.556 |  |
| 48.264                           | 33.828 |  |
| 50.782                           | 34.176 |  |
| 51.132                           | 34.881 |  |
| 51.487                           | 34.954 |  |
| 52.069                           | 35.056 |  |
| 54.059                           | 35.457 |  |
| 55.197                           | 36.508 |  |
| 56.028                           | 36.522 |  |
| 56.293                           | 36.841 |  |
| 56.634                           | 36.855 |  |
| 57.404                           | 37.349 |  |
| 59.56                            | 38.474 |  |
| 60.058                           | 38.686 |  |
| 61.074                           | 39.377 |  |
| 63.717                           | 39.59  |  |
| 64.254                           | 39.872 |  |
| 72.011                           | 40.377 |  |
| 99.421                           | 41.494 |  |
|                                  | 43.087 |  |
|                                  | 43.909 |  |
|                                  | 44.196 |  |
|                                  | 44.927 |  |
|                                  | 51.221 |  |
|                                  | 62.093 |  |
|                                  | 67.694 |  |

| Figure 1-R                                |          |          |   |
|-------------------------------------------|----------|----------|---|
| Axonal Segment Length(8 dpi)-Frequency(%) |          |          |   |
| Axonal Sd                                 | Saline   | AA       |   |
| 0                                         | 0        | 0        | 0 |
| 5                                         | 1.744186 | 9.82669  |   |
| 10                                        | 27.32558 | 57.22543 |   |
| 15                                        | 40.11628 | 24.27746 |   |
| 20                                        | 17.44186 | 6.358381 |   |
| 25                                        | 8.139535 | 2.312139 |   |
| 30                                        | 2.906977 |          |   |
| 35                                        | 2.325581 |          |   |

| Figure 1-R                       |       |  |
|----------------------------------|-------|--|
| Axonal Segment Length(8 dpi)(µm) |       |  |
| Saline                           | AA    |  |
| 3.533                            | 3.385 |  |
| 4.069                            | 3.533 |  |
| 4.57                             | 3.533 |  |
| 5.435                            | 3.533 |  |
| 5.459                            | 3.533 |  |
| 5.551                            | 3.569 |  |
| 5.574                            | 3.674 |  |
| 6.384                            | 3.942 |  |
| 6.503                            | 4.037 |  |
| 6.561                            | 4.069 |  |
| 6.561                            | 4.312 |  |
| 6.638                            | 4.514 |  |
| 6.638                            | 4.542 |  |
| 6.864                            | 4.542 |  |
| 6.864                            | 4.653 |  |
| 7.065                            | 4.761 |  |
| 7.083                            | 4.788 |  |
| 7.137                            | 5.047 |  |
| 7.137                            | 5.047 |  |
| 7.226                            | 5.072 |  |
| 7.226                            | 5.196 |  |
| 7.348                            | 5.269 |  |
| 7.587                            | 5.459 |  |
| 7.637                            | 5.551 |  |
| 7.703                            | 5.551 |  |
| 7.72                             | 5.574 |  |
| 7.835                            | 5.574 |  |
| 8.075                            | 5.642 |  |
| 8.138                            | 5.754 |  |
| 8.46                             | 5.754 |  |
| 8.579                            | 6.056 |  |
| 8.594                            | 6.056 |  |
| 8.594                            | 6.077 |  |
| 8.639                            | 6.098 |  |
| 8.639                            | 6.14  |  |
| 8.814                            | 6.14  |  |
| 8.814                            | 6.14  |  |
| 9.084                            | 6.242 |  |
| 9.084                            | 6.242 |  |
| 9.098                            | 6.242 |  |
| 9.098                            | 6.242 |  |
| 9.098                            | 6.384 |  |
| 9.098                            | 6.384 |  |
| 9.14                             | 6.463 |  |
| 9.428                            | 6.463 |  |
| 9.522                            | 6.463 |  |
| 9.575                            | 6.561 |  |
| 9.602                            | 6.561 |  |
| 9.799                            | 6.561 |  |
| 9.915                            | 6.561 |  |
| 10.093                           | 6.638 |  |
| 10.106                           | 6.771 |  |
| 10.106                           | 6.771 |  |
| 10.144                           | 6.79  |  |
| 10.293                           | 6.864 |  |
| 10.392                           | 7.029 |  |
| 10.404                           | 7.065 |  |
| 10.538                           | 7.065 |  |
| 10.598                           | 7.083 |  |
| 10.61                            | 7.137 |  |
| 10.61                            | 7.226 |  |
| 10.61                            | 7.348 |  |
| 10.706                           | 7.451 |  |

|        |        |
|--------|--------|
| 33.051 | 19.965 |
| 33.495 | 20.212 |
| 33.768 | 20.319 |
| 33.813 | 20.344 |
| 34.188 | 20.494 |
| 34.321 | 20.593 |
| 35.385 | 20.808 |
| 35.385 | 21.009 |
| 35.417 | 21.707 |
| 35.864 | 21.911 |
| 36.841 | 22.257 |
| 36.845 | 22.716 |
| 37.257 | 22.716 |
| 37.431 | 22.85  |
| 41.383 | 23.264 |
| 42.441 | 24.272 |
| 42.48  | 24.61  |
| 44.961 | 24.729 |
| 46.945 | 25.234 |
| 55.03  | 25.758 |
|        | 25.916 |
|        | 25.98  |
|        | 26.417 |
|        | 26.647 |
|        | 28.423 |
|        | 29.271 |
|        | 29.31  |
|        | 29.483 |
|        | 29.78  |
|        | 30.285 |
|        | 30.289 |
|        | 31.97  |
|        | 31.99  |
|        | 32.335 |
|        | 36.996 |
|        | 41.411 |
|        | 44.551 |
|        | 49.388 |

68.734

|        |        |
|--------|--------|
| 17.189 | 11.911 |
| 17.189 | 11.964 |
| 17.189 | 11.996 |
| 17.519 | 11.996 |
| 17.843 | 12.154 |
| 17.843 | 12.206 |
| 18.091 | 12.206 |
| 18.28  | 12.465 |
| 21.707 | 12.617 |
| 18.843 | 13.102 |
| 19.689 | 13.247 |
| 20.244 | 13.247 |
| 20.808 | 13.589 |
| 21.196 | 13.784 |
| 21.292 | 14.077 |
| 21.298 | 14.221 |
| 21.346 | 14.354 |
| 22.236 | 14.566 |
| 22.671 | 14.851 |
| 22.71  | 14.945 |
| 22.733 | 15.056 |
| 23.215 | 15.14  |
| 23.215 | 15.847 |
| 23.72  | 16.039 |
| 24.245 | 16.686 |
| 25.234 | 17.025 |
| 26.321 | 17.262 |
| 27.271 | 17.277 |
| 28.28  | 17.606 |
| 28.784 | 18.557 |
| 30.289 | 18.917 |
| 31.326 | 22.211 |
| 32.866 | 23.784 |
| 34.266 | 23.992 |
|        | 23.992 |

|        |        |
|--------|--------|
| 17.166 | 14.131 |
| 17.166 | 14.14  |
| 17.189 | 14.167 |
| 17.226 | 14.212 |
| 17.262 | 14.363 |
| 17.277 | 14.566 |
| 17.277 | 14.843 |
| 17.519 | 15.056 |
| 17.619 | 15.182 |
| 17.726 | 15.274 |
| 17.843 | 15.547 |
| 17.921 | 15.653 |
| 18.231 | 15.669 |
| 18.28  | 15.847 |
| 18.673 | 15.935 |
| 18.734 | 16.723 |
| 18.734 | 16.776 |
| 18.734 | 16.844 |
| 18.782 | 17.077 |
| 18.782 | 17.166 |
| 19.217 | 17.226 |
| 19.343 | 17.262 |
| 19.343 | 17.424 |
| 19.343 | 17.424 |
| 19.481 | 18.238 |
| 19.785 | 18.28  |
| 20.187 | 18.673 |
| 20.716 | 18.7   |
| 20.716 | 18.7   |
| 20.747 | 18.734 |
| 20.845 | 18.734 |
| 20.912 | 19.184 |
| 21.009 | 19.343 |
| 21.196 | 19.415 |
| 21.202 | 19.494 |
| 21.202 | 19.914 |
| 21.707 | 21.911 |
| 21.724 | 22.665 |
| 21.911 | 22.822 |
| 21.911 | 23.017 |
| 22.257 | 23.061 |
| 22.71  | 24.151 |
| 22.8   | 24.929 |
| 23.237 | 26.053 |
| 23.237 | 26.819 |
| 23.303 | 27.48  |
| 23.303 | 30.486 |
| 23.335 | 30.49  |
| 23.482 | 33.37  |
| 23.981 | 33.768 |
| 24.224 |        |
| 24.23  |        |
| 24.308 |        |
| 24.481 |        |
| 24.734 |        |
| 24.75  |        |
| 24.75  |        |
| 25.535 |        |
| 25.743 |        |
| 25.916 |        |
| 26.287 |        |
| 26.441 |        |
| 26.919 |        |

Figure 2

| Figure 2-I                  |      |        |     |
|-----------------------------|------|--------|-----|
| Number of MAG positive cell |      |        |     |
| 5 dpi                       |      | 8 dpi  |     |
| Saline                      | AA   | Saline | AA  |
| 1764                        | 1121 | 487    | 199 |
| 1533                        | 1209 | 539    | 233 |
| 1639                        | 1334 | 692    | 353 |
| 1421                        | 993  | 454    | 263 |
| 1768                        | 1006 | 584    | 271 |
| 1589                        | 1225 | 593    | 185 |
| 2101                        | 1308 | 667    | 193 |
| 1683                        | 1229 | 695    | 308 |
| 1449                        | 1364 | 549    | 311 |
| 1525                        | 1394 | 496    | 279 |
| 1628                        | 1252 | 543    | 284 |
| 1644                        |      | 261    |     |

| Figure 2-J                    |     |        |      |
|-------------------------------|-----|--------|------|
| Number of c-Jun positive cell |     |        |      |
| 5 dpi                         |     | 8 dpi  |      |
| Saline                        | AA  | Saline | AA   |
| 718                           | 860 | 700    | 993  |
| 698                           | 995 | 783    | 1114 |
| 500                           | 750 | 865    | 1205 |
| 552                           | 837 | 724    | 969  |
| 726                           | 889 | 844    | 1185 |
| 596                           | 892 | 785    | 1211 |
| 623                           | 814 | 693    | 947  |
| 682                           | 783 | 752    | 851  |
| 642                           | 866 | 793    | 1119 |
| 711                           | 852 | 818    | 1257 |
| 572                           | 913 | 865    | 1259 |
| 649                           |     | 768    | 1196 |
| 633                           |     |        | 1269 |
|                               |     |        | 881  |

| Figure 2-L                    |         |         |       |
|-------------------------------|---------|---------|-------|
| Relative protein level(5 dpi) |         |         |       |
| MAG                           |         | c-Jun   |       |
| Saline                        | AA      | Saline  | AA    |
| 1.278                         | 0.35865 | 0.13057 | 1.38  |
| 0.8527                        | 0.29561 | 0.27082 | 1.093 |
| 1.104                         | 0.11945 | 0.07019 | 1.445 |

| Figure 2-N                    |         |        |         |
|-------------------------------|---------|--------|---------|
| Relative protein level(8 dpi) |         |        |         |
| MAG                           |         | Saline | c-Jun   |
| Saline                        | AA      | Saline | AA      |
| 1.29845                       | 0.38263 | 0.3    | 1.99484 |
| 1.49267                       | 0.48592 | 0.1    | 1.74846 |
| 1.505427                      | 0.55892 | 0.2    | 1.53208 |

Figure 3

| Figure 3-M                                |           |           |   |
|-------------------------------------------|-----------|-----------|---|
| Axonal Segment Length(5 div)-Frequency(%) |           |           |   |
| Axonal Seg                                | Con       | AA        |   |
| 0                                         | 0         | 0         | 0 |
| 10                                        | 4.49827   | 12.90323  |   |
| 20                                        | 22.83737  | 32.97491  |   |
| 30                                        | 33.21799  | 27.95699  |   |
| 40                                        | 19.37716  | 14.33692  |   |
| 50                                        | 10.0346   | 7.885304  |   |
| 60                                        | 7.266436  | 2.50896   |   |
| 70                                        | 1.394083  | 0.7168459 |   |
| 80                                        | 0.6920415 | 0.7168459 |   |
| 90                                        | 0.6920415 |           |   |

| Figure 3-M                      |        |  |
|---------------------------------|--------|--|
| Axonal Segment Length(5 div)-μm |        |  |
| Con                             | AA     |  |
| 5.551                           | 3.674  |  |
| 5.574                           | 4.57   |  |
| 6.056                           | 5.072  |  |
| 7.278                           | 5.269  |  |
| 7.637                           | 5.574  |  |
| 7.72                            | 5.574  |  |
| 8.075                           | 6.077  |  |
| 8.138                           | 6.077  |  |
| 8.323                           | 6.098  |  |
| 8.624                           | 6.561  |  |
| 9.084                           | 6.561  |  |
| 9.589                           | 6.58   |  |
| 9.708                           | 6.638  |  |
| 10.206                          | 6.733  |  |
| 10.538                          | 6.733  |  |
| 10.598                          | 7.065  |  |
| 11.206                          | 7.065  |  |
| 11.206                          | 7.226  |  |
| 11.285                          | 7.226  |  |
| 11.879                          | 7.57   |  |
| 12.112                          | 7.57   |  |
| 12.112                          | 7.587  |  |
| 12.123                          | 7.906  |  |
| 12.154                          | 8.075  |  |
| 12.627                          | 8.215  |  |
| 13.121                          | 8.579  |  |
| 13.589                          | 8.814  |  |
| 13.626                          | 9.084  |  |
| 13.729                          | 9.098  |  |
| 14.131                          | 9.278  |  |
| 14.452                          | 9.575  |  |
| 14.644                          | 9.602  |  |
| 15.149                          | 9.642  |  |
| 15.174                          | 9.642  |  |
| 15.162                          | 9.915  |  |
| 15.216                          | 9.941  |  |
| 15.274                          | 10.093 |  |
| 15.653                          | 10.093 |  |
| 15.718                          | 10.144 |  |
| 16.181                          | 10.293 |  |
| 16.181                          | 10.61  |  |
| 16.22                           | 10.61  |  |
| 16.22                           | 10.81  |  |
| 16.275                          | 10.789 |  |
| 16.275                          | 10.871 |  |
| 16.291                          | 11.103 |  |
| 16.654                          | 11.285 |  |
| 16.662                          | 11.285 |  |
| 16.685                          | 11.386 |  |
| 17.137                          | 11.508 |  |
| 17.189                          | 11.53  |  |
| 17.189                          | 11.607 |  |
| 17.226                          | 11.618 |  |
| 17.262                          | 11.618 |  |
| 17.277                          | 11.651 |  |
| 17.671                          | 11.651 |  |
| 17.779                          | 11.651 |  |
| 18.013                          | 11.738 |  |
| 18.231                          | 11.738 |  |
| 18.238                          | 11.782 |  |
| 18.28                           | 12.112 |  |
| 18.343                          | 12.123 |  |
| 18.68                           | 12.154 |  |
| 18.7                            | 12.372 |  |
| 18.727                          | 12.465 |  |
| 18.917                          | 12.617 |  |
| 18.917                          | 12.617 |  |
| 19.178                          | 12.617 |  |
| 19.184                          | 12.627 |  |
| 19.184                          | 12.816 |  |
| 19.204                          | 13.038 |  |
| 19.237                          | 13.16  |  |
| 19.284                          | 13.626 |  |
| 19.284                          | 13.626 |  |

| Figure 3-N                                |           |           |   |
|-------------------------------------------|-----------|-----------|---|
| Myelin Segment Length(5 div)-Frequency(%) |           |           |   |
| Myelin Seg                                | Con       | AA        |   |
| 0                                         | 0         | 0         | 0 |
| 10                                        | 4.561403  | 8.709678  |   |
| 20                                        | 6.31579   | 21.29032  |   |
| 30                                        | 16.49123  | 26.45161  |   |
| 40                                        | 20.70175  | 18.70968  |   |
| 50                                        | 17.19298  | 13.87097  |   |
| 60                                        | 12.63158  | 4.516129  |   |
| 70                                        | 8.070175  | 3.225906  |   |
| 80                                        | 3.157895  | 0.9677419 |   |
| 90                                        | 5.964912  | 1.612903  |   |
| 100                                       | 2.45614   | 0.6451613 |   |
| 110                                       | 1.403509  |           |   |
| 120                                       | 0.3508772 |           |   |
| 130                                       | 0         |           |   |
| 140                                       | 0         |           |   |
| 150                                       | 0.7017544 |           |   |

| Figure 3-N                      |        |  |
|---------------------------------|--------|--|
| Myelin Segment Length(5 div)-μm |        |  |
| Con                             | AA     |  |
| 3.224                           | 4.236  |  |
| 5.322                           | 4.588  |  |
| 6.627                           | 4.588  |  |
| 6.934                           | 4.623  |  |
| 7.1                             | 6.117  |  |
| 7.299                           | 6.647  |  |
| 8.156                           | 7.137  |  |
| 8.438                           | 7.191  |  |
| 9.19                            | 7.422  |  |
| 9.302                           | 7.714  |  |
| 9.686                           | 7.722  |  |
| 9.699                           | 7.773  |  |
| 9.898                           | 7.858  |  |
| 10.309                          | 7.914  |  |
| 11.227                          | 7.974  |  |
| 12.245                          | 8.283  |  |
| 12.245                          | 8.397  |  |
| 12.277                          | 8.438  |  |
| 12.906                          | 8.732  |  |
| 14.792                          | 8.792  |  |
| 15.596                          | 9.019  |  |
| 15.803                          | 9.033  |  |
| 17.437                          | 9.232  |  |
| 17.452                          | 9.26   |  |
| 17.849                          | 9.302  |  |
| 17.849                          | 9.358  |  |
| 18.359                          | 9.523  |  |
| 18.465                          | 10.195 |  |
| 19.196                          | 10.208 |  |
| 19.538                          | 10.208 |  |
| 19.94                           | 10.814 |  |
| 21.435                          | 10.836 |  |
| 21.465                          | 10.981 |  |
| 21.973                          | 11.029 |  |
| 22.453                          | 11.215 |  |
| 22.482                          | 11.319 |  |
| 22.574                          | 11.319 |  |
| 23.965                          | 11.347 |  |
| 23.981                          | 11.501 |  |
| 24.474                          | 11.769 |  |
| 24.554                          | 11.999 |  |
| 25.026                          | 12.744 |  |
| 25.062                          | 12.997 |  |
| 25.127                          | 13.283 |  |
| 25.165                          | 13.41  |  |
| 25.494                          | 13.41  |  |
| 25.813                          | 13.497 |  |
| 26.043                          | 13.75  |  |
| 26.123                          | 13.764 |  |
| 26.316                          | 13.764 |  |
| 26.513                          | 13.802 |  |
| 26.528                          | 13.825 |  |
| 26.528                          | 13.849 |  |
| 26.611                          | 13.973 |  |
| 27.095                          | 14.274 |  |
| 27.252                          | 14.419 |  |
| 27.532                          | 14.499 |  |
| 27.546                          | 14.818 |  |
| 27.546                          | 14.923 |  |
| 27.603                          | 15.293 |  |
| 27.697                          | 15.293 |  |
| 28.042                          | 15.302 |  |
| 28.056                          | 15.327 |  |
| 28.153                          | 15.369 |  |
| 28.588                          | 15.428 |  |
| 28.697                          | 15.999 |  |
| 28.711                          | 16.056 |  |
| 28.711                          | 16.344 |  |
| 28.81                           | 16.663 |  |
| 28.931                          | 16.959 |  |
| 29.061                          | 17.014 |  |
| 29.061                          | 17.452 |  |
| 29.128                          | 17.465 |  |
| 29.2                            | 17.734 |  |

| Figure 3-O                                |           |           |   |
|-------------------------------------------|-----------|-----------|---|
| Axonal Segment Length(8 div)-Frequency(%) |           |           |   |
| Axonal Seg                                | Con       | AA        |   |
| 0                                         | 0         | 0         | 0 |
| 5                                         | 0         | 4.040404  |   |
| 10                                        | 12.5      | 39.39394  |   |
| 15                                        | 26.5625   | 27.94613  |   |
| 20                                        | 27.60417  | 14.14141  |   |
| 25                                        | 11.97917  | 7.070707  |   |
| 30                                        | 8.333333  | 3.030303  |   |
| 35                                        | 4.166667  | 2.693603  |   |
| 40                                        | 3.645833  | 1.346801  |   |
| 45                                        | 2.604167  | 0.3367004 |   |
| 50                                        | 2.083333  |           |   |
| 55                                        | 0.5208333 |           |   |

| Figure 3-O                      |       |  |
|---------------------------------|-------|--|
| Axonal Segment Length(8 div)-μm |       |  |
| Con                             | AA    |  |
| 5.047                           | 3.533 |  |
| 5.551                           | 3.533 |  |
| 5.551                           | 3.533 |  |
| 6.05                            |       |  |

|        |        |
|--------|--------|
| 19.343 | 13.636 |
| 19.343 | 13.664 |
| 19.494 | 13.664 |
| 19.83  | 14.131 |
| 19.843 | 14.14  |
| 20.187 | 14.274 |
| 20.193 | 14.354 |
| 20.244 | 14.531 |
| 20.288 | 14.636 |
| 20.288 | 14.644 |
| 20.413 | 14.644 |
| 20.413 | 14.714 |
| 20.494 | 15.653 |
| 20.494 | 15.677 |
| 20.692 | 15.7   |
| 20.692 | 15.935 |
| 20.698 | 16.157 |
| 20.79  | 16.157 |
| 20.912 | 16.181 |
| 20.912 | 16.431 |
| 21.292 | 16.439 |
| 21.298 | 16.662 |
| 21.489 | 16.685 |
| 21.701 | 16.723 |
| 21.701 | 16.776 |
| 21.847 | 16.776 |
| 21.911 | 17.159 |
| 22.211 | 17.166 |
| 22.257 | 17.262 |
| 22.257 | 17.277 |
| 22.28  | 17.424 |
| 22.28  | 17.692 |
| 22.665 | 17.843 |
| 22.71  | 17.921 |
| 22.71  | 18.231 |
| 22.71  | 18.343 |
| 22.733 | 18.37  |
| 22.85  | 18.673 |
| 23.215 | 18.734 |
| 23.298 | 18.782 |
| 23.303 | 19     |
| 23.412 | 19.104 |
| 23.412 | 19.184 |
| 23.563 | 19.184 |
| 23.563 | 19.204 |
| 23.72  | 19.217 |
| 23.805 | 19.5   |
| 23.869 | 19.708 |
| 23.981 | 19.708 |
| 24.224 | 19.74  |
| 24.23  | 19.74  |
| 24.245 | 19.785 |
| 24.251 | 19.843 |
| 24.308 | 19.843 |
| 24.355 | 20.092 |
| 24.361 | 20.193 |
| 24.744 | 20.212 |
| 24.775 | 20.244 |
| 24.811 | 20.45  |
| 24.98  | 20.692 |
| 25.314 | 20.79  |
| 25.314 | 20.845 |
| 25.359 | 21.202 |
| 25.415 | 21.202 |
| 25.535 | 21.346 |
| 25.584 | 21.754 |
| 25.639 | 21.754 |
| 25.738 | 21.795 |
| 25.738 | 21.847 |
| 25.743 | 21.911 |
| 25.783 | 22.171 |
| 25.817 | 22.211 |
| 25.98  | 22.211 |
| 26.136 | 22.28  |
| 26.262 | 22.411 |
| 26.364 | 22.716 |
| 26.417 | 22.716 |
| 26.633 | 22.772 |
| 26.748 | 22.8   |
| 26.748 | 22.911 |
| 26.79  | 23.066 |
| 27.22  | 23.22  |
| 27.257 | 23.352 |
| 27.294 | 23.725 |
| 27.294 | 23.741 |
| 27.327 | 24.224 |
| 27.812 | 24.775 |
| 27.981 | 24.857 |
| 28.262 | 24.857 |
| 28.266 | 24.898 |
| 28.374 | 25.344 |
| 28.771 | 25.359 |
| 28.925 | 25.743 |
| 29.275 | 25.783 |
| 29.275 | 26.228 |
| 29.31  | 26.262 |
| 29.483 | 26.552 |
| 29.776 | 26.552 |
| 29.78  | 26.724 |
| 29.793 | 26.748 |
| 29.882 | 26.767 |
| 30.048 | 26.98  |
| 30.318 | 27.051 |
| 30.348 | 27.252 |
| 30.385 | 27.294 |
| 30.486 | 27.294 |
| 30.802 | 27.327 |
| 30.822 | 27.42  |
| 30.987 | 27.42  |
| 31.196 | 27.457 |
| 31.294 | 27.5   |
| 31.306 | 27.757 |
| 31.326 | 27.757 |
| 31.391 | 27.798 |
| 31.798 | 27.922 |
| 31.858 | 28.266 |
| 31.938 | 28.374 |
| 31.99  | 28.423 |
| 32.117 | 28.423 |
| 32.315 | 28.522 |
| 32.315 | 28.57  |
| 32.362 | 28.709 |
| 32.691 | 28.771 |
| 32.862 | 29.048 |
| 32.901 | 29.206 |
| 33.19  | 29.288 |
| 33.324 | 29.297 |
| 33.617 | 29.483 |
| 33.873 | 29.548 |
| 33.873 | 29.78  |
| 33.948 | 29.793 |
| 34.117 | 29.814 |
| 34.822 | 30.048 |
| 34.826 | 30.348 |
| 34.881 | 30.723 |
| 34.914 | 30.785 |
| 35.385 | 31.306 |
| 35.385 | 31.326 |
| 35.417 | 31.489 |
| 35.457 | 31.83  |
| 35.457 | 32.117 |
| 35.921 | 32.397 |

|        |        |
|--------|--------|
| 29.417 | 17.849 |
| 29.571 | 17.849 |
| 29.724 | 17.871 |
| 29.921 | 17.958 |
| 30.081 | 18.044 |
| 30.094 | 18.095 |
| 30.115 | 18.352 |
| 30.146 | 18.563 |
| 30.586 | 18.605 |
| 31.008 | 18.862 |
| 31.096 | 18.868 |
| 31.1   | 18.923 |
| 31.296 | 19.221 |
| 31.3   | 19.297 |
| 31.606 | 19.344 |
| 31.643 | 19.371 |
| 31.643 | 19.478 |
| 31.643 | 19.478 |
| 31.643 | 19.611 |
| 32.152 | 19.697 |
| 32.725 | 19.862 |
| 33.057 | 20.039 |
| 33.151 | 20.391 |
| 33.198 | 20.584 |
| 33.741 | 20.694 |
| 34.155 | 20.625 |
| 34.158 | 20.63  |
| 34.25  | 20.667 |
| 34.533 | 20.907 |
| 34.664 | 21.06  |
| 34.668 | 21.465 |
| 34.668 | 21.507 |
| 35.266 | 21.58  |
| 35.699 | 21.871 |
| 35.742 | 21.944 |
| 35.815 | 22.132 |
| 35.916 | 22.132 |
| 36.046 | 22.132 |
| 36.194 | 22.437 |
| 36.208 | 22.637 |
| 36.226 | 22.94  |
| 36.269 | 22.945 |
| 36.76  | 22.962 |
| 36.76  | 22.985 |
| 36.76  | 22.991 |
| 37.255 | 23.081 |
| 37.436 | 23.216 |
| 37.599 | 23.455 |
| 37.723 | 23.499 |
| 37.723 | 23.588 |
| 37.726 | 23.648 |
| 37.847 | 23.788 |
| 37.891 | 23.775 |
| 38.001 | 24.046 |
| 38.301 | 24.191 |
| 38.45  | 24.223 |
| 38.863 | 24.234 |
| 38.893 | 24.517 |
| 38.99  | 24.517 |
| 39.077 | 24.659 |
| 39.252 | 24.979 |
| 39.765 | 25.169 |
| 39.922 | 25.415 |
| 39.922 | 25.489 |
| 40.59  | 25.494 |
| 40.896 | 25.737 |
| 41.32  | 25.737 |
| 41.492 | 26.003 |
| 41.492 | 26.043 |
| 41.801 | 26.197 |
| 41.829 | 26.316 |
| 41.913 | 26.439 |
| 42.052 | 26.513 |
| 42.247 | 26.513 |
| 42.323 | 26.517 |
| 42.796 | 26.528 |
| 43.014 | 26.528 |
| 43.405 | 26.602 |
| 43.522 | 27.018 |
| 43.522 | 27.231 |
| 43.692 | 27.324 |
| 43.852 | 27.495 |
| 43.888 | 27.528 |
| 44     | 27.532 |
| 44.4   | 27.594 |
| 44.455 | 27.74  |
| 44.502 | 27.907 |
| 44.932 | 28.079 |
| 44.964 | 28.264 |
| 45.372 | 28.314 |
| 45.395 | 28.337 |
| 45.441 | 28.487 |
| 45.553 | 28.837 |
| 45.553 | 28.866 |
| 45.891 | 28.913 |
| 45.95  | 29.075 |
| 46.06  | 29.169 |
| 46.599 | 29.169 |
| 47.296 | 29.169 |
| 47.409 | 29.279 |
| 47.452 | 29.583 |
| 47.603 | 29.676 |
| 47.802 | 29.694 |
| 47.918 | 30.094 |
| 48.092 | 30.115 |
| 48.439 | 30.149 |
| 48.938 | 30.462 |
| 48.968 | 30.739 |
| 49.471 | 30.794 |
| 49.542 | 30.927 |
| 49.576 | 31.246 |
| 49.856 | 31.622 |
| 49.96  | 31.643 |
| 50.49  | 31.708 |
| 50.632 | 31.839 |
| 50.675 | 32.152 |
| 51.069 | 32.462 |
| 51.183 | 32.529 |
| 51.648 | 32.601 |
| 51.999 | 32.621 |
| 52.119 | 32.641 |
| 52.298 | 32.641 |
| 52.506 | 32.766 |
| 52.714 | 32.82  |
| 52.989 | 32.878 |
| 53.302 | 33.018 |
| 53.526 | 33.385 |
| 53.536 | 33.598 |
| 53.768 | 33.649 |
| 54.074 | 33.937 |
| 54.23  | 34.158 |
| 54.441 | 34.215 |
| 54.567 | 34.25  |
| 54.783 | 34.688 |
| 56.112 | 34.743 |
| 56.262 | 34.758 |
| 56.465 | 35.037 |
| 57.115 | 35.115 |
| 57.169 | 35.266 |
| 57.24  | 35.717 |
| 57.321 | 35.775 |
| 58.044 | 35.775 |

|        |        |
|--------|--------|
| 14.911 | 7.98   |
| 15.056 | 8.075  |
| 15.14  | 8.075  |
| 15.14  | 8.075  |
| 15.182 | 8.075  |
| 15.274 | 8.075  |
| 15.645 | 8.075  |
| 15.539 | 8.091  |
| 14.639 | 8.091  |
| 16.039 | 8.138  |
| 16.126 | 8.138  |
| 16.15  | 8.138  |
| 16.15  | 8.153  |
| 16.345 | 8.215  |
| 16.345 | 8.215  |
| 16.662 | 8.323  |
| 16.662 | 8.323  |
| 16.695 | 8.579  |
| 16.723 | 8.579  |
| 16.723 | 8.579  |
| 16.92  | 8.579  |
| 17.159 | 8.579  |
| 17.159 | 8.579  |
| 17.343 | 8.594  |
| 17.424 | 8.594  |
| 17.671 | 8.712  |
| 17.671 | 8.828  |
| 17.692 | 8.943  |
| 17.843 | 9.084  |
| 18.168 | 9.084  |
| 18.175 | 9.084  |
| 18.175 | 9.098  |
| 18.343 | 9.14   |
| 18.598 | 9.14   |
| 18.673 | 9.14   |
| 18.68  | 9.14   |
| 18.7   | 9.209  |
| 18.843 | 9.209  |
| 19.184 | 9.306  |
| 19.204 | 9.306  |
| 19.343 | 9.428  |
| 19.422 | 9.575  |
| 19.494 | 9.589  |
| 19.598 | 9.589  |
| 19.598 | 9.589  |
| 19.598 | 9.602  |
| 19.682 | 9.602  |
| 19.689 | 9.602  |
| 19.689 | 9.642  |
| 19.708 | 9.642  |
| 19.708 | 9.708  |
| 19.708 | 9.708  |
| 19.74  | 9.799  |
| 19.74  | 9.915  |
| 20.319 | 9.941  |
| 20.413 | 10.093 |
| 20.716 | 10.106 |
| 20.991 | 10.106 |
| 21.202 | 10.144 |
| 21.208 | 10.206 |
| 21.423 | 10.404 |
| 21.724 | 10.404 |
| 21.724 | 10.404 |
| 22.044 | 10.502 |
| 22.171 | 10.538 |
| 22.297 | 10.598 |
| 22.57  | 10.598 |
| 22.665 | 10.61  |
| 23.066 | 10.61  |
| 23.066 | 10.61  |
| 23.066 | 10.61  |
| 23.066 | 10.646 |
| 23.303 | 10.694 |
| 23.912 | 10.789 |
| 24.224 | 10.789 |
| 24.272 | 10.894 |
| 24.705 | 11.103 |
| 24.775 | 11.103 |
| 25.48  | 11.114 |
| 25.916 | 11.114 |
| 26.262 | 11.114 |
| 26.262 | 11.171 |
| 26.48  | 11.206 |
| 26.824 | 11.206 |
| 27.252 | 11.206 |
| 27.294 | 11.285 |
| 27.628 | 11.508 |
| 27.757 | 11.53  |
| 28.126 | 11.607 |
| 28.414 | 11.607 |
| 28.771 | 11.651 |
| 28.784 | 11.651 |
| 29.38  | 11.651 |
| 29.814 | 11.706 |
| 30.2   | 11.782 |
| 31.436 | 11.996 |
| 31.81  | 12.112 |
| 31.894 | 12.112 |
| 32.901 | 12.123 |
| 32.943 | 12.206 |
| 33.552 | 12.279 |
| 34.554 | 12.485 |
| 35.117 | 12.867 |
| 36.73  | 13.102 |
| 36.758 | 13.102 |
| 39.687 | 13.121 |
| 40.907 | 13.121 |
| 40.991 | 13.121 |
| 42.42  | 13.131 |
| 42.692 | 13.131 |
| 43.414 | 13.209 |
| 43.428 | 13.276 |
| 44.414 | 13.276 |
| 47.442 | 13.276 |
| 47.506 | 13.324 |
| 49.018 | 13.362 |
| 49.326 | 13.466 |
| 57.641 | 13.626 |
|        | 13.626 |
|        | 13.636 |
|        | 13.636 |
|        | 13.664 |
|        | 13.71  |
|        | 13.71  |
|        | 13.775 |
|        | 13.775 |
|        | 13.775 |
|        | 13.858 |
|        | 13.858 |
|        | 14.131 |
|        | 14.131 |
|        | 14.14  |
|        | 14.167 |
|        | 14.212 |
|        | 14.452 |
|        | 14.67  |
|        | 14.714 |
|        | 14.714 |
|        | 14.851 |
|        | 14.911 |
|        | 14.945 |
|        | 15.056 |
|        | 15.547 |
|        | 15.669 |
|        | 15.677 |

|        |        |
|--------|--------|
| 15.645 | 14.774 |
| 15.653 | 14.903 |
| 15.677 | 15.149 |
| 15.718 | 15.149 |
| 15.935 | 15.182 |
| 16.157 | 15.216 |
| 16.157 | 15.216 |
| 16.157 | 15.274 |
| 16.157 | 15.44  |
| 16.22  | 15.44  |
| 16.275 | 15.58  |
| 16.345 | 15.653 |
| 16.439 | 15.677 |
| 16.654 | 15.718 |
| 16.723 | 15.775 |
| 16.776 | 16.157 |
| 17.137 | 16.157 |
| 17.159 | 16.157 |
| 17.159 | 16.22  |
| 17.189 | 16.275 |
| 17.189 | 16.647 |
| 17.226 | 16.647 |
| 17.226 | 16.723 |
| 17.343 | 16.844 |
| 17.692 | 16.844 |
| 18.013 | 17.159 |
| 18.343 | 17.189 |
| 18.343 | 17.189 |
| 18.508 | 17.189 |
| 18.673 | 17.664 |
| 18.68  | 17.671 |
| 18.7   | 17.779 |
| 18.7   | 17.843 |
| 18.7   | 18.238 |
| 18.727 | 18.28  |
| 18.782 | 18.419 |
| 18.917 | 18.508 |
| 19.204 | 18.7   |
| 19.237 | 18.727 |
| 19.343 | 19.178 |
| 19.682 | 19.178 |
| 19.888 | 19.184 |
| 19.997 | 19.184 |
| 20.187 | 19.237 |
| 20.187 | 19.237 |
| 20.187 | 19.237 |
| 20.187 | 19.284 |
| 20.288 | 19.343 |
| 20.413 | 19.689 |
| 20.692 | 19.708 |
| 20.692 | 19.792 |
| 20.716 | 19.914 |
| 20.79  | 20.187 |
| 20.845 | 20.2   |
| 20.991 | 20.212 |
| 21.088 | 20.494 |
| 21.196 | 20.58  |

|        |        |         |        |        |        |        |
|--------|--------|---------|--------|--------|--------|--------|
| 36.35  | 32.839 | 58.123  | 36.323 | 15.677 | 34.855 | 37.756 |
| 37.513 | 33.312 | 58.337  | 36.494 | 15.718 | 34.881 | 38.255 |
| 37.563 | 33.37  | 59.12   | 36.6   | 15.847 | 35.262 | 38.474 |
| 37.563 | 33.817 | 59.153  | 37.269 | 15.935 | 35.342 | 38.873 |
| 37.621 | 33.847 | 59.418  | 37.412 | 16.15  | 35.36  | 39.303 |
| 37.971 | 33.907 | 59.504  | 37.633 | 16.22  | 35.532 | 39.368 |
| 38.065 | 34.333 | 59.782  | 37.737 | 16.275 | 35.832 | 39.394 |
| 38.255 | 34.351 | 59.861  | 37.737 | 16.477 | 35.921 | 39.523 |
| 38.408 | 34.41  | 60.155  | 37.921 | 16.854 | 36.119 | 39.754 |
| 38.517 | 34.451 | 60.155  | 37.943 | 16.723 | 36.259 | 39.872 |
| 38.912 | 34.617 | 60.172  | 38.233 | 16.844 | 36.35  | 39.882 |
| 38.942 | 34.881 | 60.369  | 38.236 | 16.92  | 36.392 | 40.187 |
| 39.368 | 34.914 | 60.517  | 39.305 | 16.965 | 36.392 | 40.377 |
| 39.872 | 34.954 | 60.575  | 39.305 | 17.137 | 36.841 | 41.383 |
| 39.882 | 34.954 | 60.774  | 39.335 | 17.159 | 36.927 | 41.46  |
| 40.184 | 35.117 | 61.024  | 39.569 | 17.189 | 37.01  | 41.9   |
| 41.411 | 35.385 | 61.175  | 39.765 | 17.226 | 37.062 | 43.507 |
| 41.411 | 35.75  | 62.154  | 39.89  | 17.262 | 37.346 | 43.639 |
| 41.432 | 36.059 | 62.869  | 39.935 | 17.343 | 37.468 | 45.168 |
| 41.58  | 36.368 | 63.263  | 40.156 | 17.671 | 37.513 | 45.521 |
| 41.891 | 36.368 | 63.74   | 40.285 | 17.843 | 37.513 | 47.968 |
| 41.9   | 36.56  | 64.791  | 40.49  | 17.921 | 37.904 | 48.159 |
| 41.9   | 37.468 | 65.778  | 40.985 | 18.013 | 38.008 | 49.715 |
| 41.936 | 37.881 | 65.857  | 41.295 | 18.515 | 38.355 | 50.994 |
| 42.037 | 38.368 | 66.272  | 41.37  | 18.673 | 38.408 | 51.034 |
| 42.133 | 38.86  | 66.552  | 41.37  | 18.7   | 38.538 | 51.174 |
| 42.396 | 39.124 | 66.626  | 41.445 | 18.734 | 38.567 | 52.466 |
| 42.539 | 39.368 | 66.85   | 41.721 | 18.734 | 38.889 | 52.525 |
| 42.945 | 39.792 | 67.646  | 41.721 | 18.782 | 38.912 | 52.605 |
| 43.087 | 39.898 | 68.681  | 41.742 | 19.184 | 38.912 | 54.563 |
| 43.405 | 40.424 | 68.827  | 41.804 | 19.184 | 39.364 | 55.461 |
| 43.545 | 40.991 | 70.902  | 41.814 | 19.343 | 39.368 | 55.461 |
| 44.048 | 41.254 | 71.484  | 42.17  | 19.682 | 39.416 | 55.626 |
| 44.551 | 41.485 | 71.55   | 42.432 | 19.882 | 39.661 | 57.8   |
| 45.139 | 41.824 | 72.502  | 43.333 | 19.682 | 39.949 | 60.058 |
| 45.465 | 43.087 | 74.428  | 43.681 | 19.689 | 40.374 | 63.116 |
| 47.154 | 43.235 | 75.047  | 43.843 | 19.74  | 41.077 | 64.095 |
| 47.439 | 43.526 | 76.127  | 43.867 | 19.843 | 41.432 | 74.434 |
| 48.449 | 43.909 | 76.29   | 43.947 | 20.244 | 41.891 | 10.33  |
| 48.459 | 44.322 | 77.621  | 44.197 | 20.269 | 41.915 | 5.23   |
| 48.472 | 45.6   | 80.04   | 44.301 | 20.344 | 41.997 | 1.08   |
| 48.956 | 46.202 | 81.321  | 44.587 | 20.413 | 42.037 | 2.89   |
| 48.991 | 46.466 | 81.875  | 44.736 | 20.587 | 42.037 | 4.36   |
| 49.973 | 47.442 | 82.608  | 44.736 | 20.747 | 42.191 |        |
| 50.054 | 48.459 | 82.936  | 44.871 | 20.747 | 42.323 |        |
| 50.285 | 48.491 | 83.094  | 45.045 | 21.346 | 43.449 |        |
| 50.47  | 48.711 | 83.602  | 45.275 | 21.701 | 43.449 |        |
| 51.273 | 48.953 | 83.832  | 45.573 | 21.795 | 43.589 |        |
| 52.496 | 49.036 | 84.66   | 45.82  | 22.57  | 43.694 |        |
| 53.612 | 49.715 | 85.641  | 45.879 | 22.671 | 44.483 |        |
| 54.528 | 49.973 | 85.866  | 45.866 | 22.761 | 46.061 |        |
| 55.597 | 49.986 | 85.716  | 46.389 | 23.22  | 47.707 |        |
| 57.251 | 50.003 | 86.157  | 47.411 | 23.303 | 47.944 |        |
| 57.674 | 50.629 | 86.273  | 47.962 | 23.303 | 47.963 |        |
| 58.046 | 50.829 | 86.715  | 48.382 | 23.72  | 48.01  |        |
| 60.401 | 53.555 | 87.177  | 48.949 | 24.224 | 49.081 |        |
| 61.323 | 55.157 | 88.461  | 48.962 | 24.308 | 49.965 |        |
| 62.149 | 58.057 | 91.285  | 48.98  | 24.729 | 50.49  |        |
| 62.28  | 59.502 | 91.34   | 49.069 | 24.775 | 52.179 |        |
| 63.31  | 61.315 | 94.109  | 49.49  | 25.254 | 52.605 |        |
| 64.647 | 66.617 | 94.33   | 49.576 | 25.743 | 53.498 |        |
| 65.703 | 71.612 | 95.021  | 49.765 | 25.758 | 53.602 |        |
| 66.603 | 78.283 | 99.153  | 50.56  | 26.79  | 54.002 |        |
| 67.123 |        | 102.484 | 50.675 | 27.42  | 54.028 |        |
| 69.363 |        | 106.553 | 51.069 | 27.83  | 55.009 |        |
| 70.51  |        | 107.111 | 51.474 | 28.262 | 57.535 |        |
| 73.185 |        | 108.076 | 51.999 | 29.483 | 58.245 |        |
| 73.689 |        | 119.912 | 53.026 | 30.619 | 58.62  |        |
| 79.753 |        | 143.399 | 53.06  | 30.822 | 58.759 |        |
| 80.875 |        | 143.77  | 53.104 | 31.375 | 59.81  |        |
| 85.29  |        |         | 53.261 | 32.315 | 60.636 |        |
| 91.459 |        |         | 53.874 | 32.335 | 60.731 |        |
| 97.109 |        |         | 54.144 | 33.552 | 62.077 |        |
|        |        |         | 54.555 | 33.813 | 62.744 |        |
|        |        |         | 55.94  | 33.847 | 63.086 |        |
|        |        |         | 56.914 | 34.351 | 66.345 |        |
|        |        |         | 60.231 | 37.346 | 66.878 |        |
|        |        |         | 60.632 | 37.468 | 67.123 |        |
|        |        |         | 60.632 | 39.828 | 67.673 |        |
|        |        |         | 62.361 | 40.127 | 68.86  |        |
|        |        |         | 62.837 |        | 78.265 |        |
|        |        |         | 65.76  |        | 89.7   |        |
|        |        |         | 68.3   |        | 88.53  |        |
|        |        |         | 69.047 |        | 89.66  |        |
|        |        |         | 69.09  |        |        |        |
|        |        |         | 69.84  |        |        |        |
|        |        |         | 71.445 |        |        |        |
|        |        |         | 73.924 |        |        |        |
|        |        |         | 75.53  |        |        |        |
|        |        |         | 80.545 |        |        |        |
|        |        |         | 85.663 |        |        |        |
|        |        |         | 85.935 |        |        |        |
|        |        |         | 87.829 |        |        |        |
|        |        |         | 88.188 |        |        |        |
|        |        |         | 92.304 |        |        |        |
|        |        |         | 92.724 |        |        |        |

Figure 4

| Figure 4-C                  |    |    | Figure 4-D                  |    |    | Figure 4-G            |    |   | Figure 4-H                  |    |    |
|-----------------------------|----|----|-----------------------------|----|----|-----------------------|----|---|-----------------------------|----|----|
| No of P type fibers (5 div) |    |    | No of D type fibers (5 div) |    |    | P type fibers (5 div) |    |   | No of D type fibers (8 div) |    |    |
| Con                         | AA |    | Con                         | AA |    | Con                   | AA |   | Con                         | AA |    |
| 16                          |    | 4  | 2                           |    | 7  | 4                     |    | 6 | 7                           |    | 12 |
| 15                          |    | 1  | 3                           |    | 10 | 4                     |    | 5 | 9                           |    | 18 |
| 14                          |    | 5  | 4                           |    | 6  | 5                     |    | 8 | 10                          |    | 19 |
| 13                          |    | 4  | 3                           |    | 7  | 6                     |    | 1 | 10                          |    | 24 |
| 8                           |    | 3  | 13                          |    | 10 | 9                     |    | 3 | 14                          |    | 20 |
| 17                          |    | 3  | 8                           |    | 9  | 10                    |    | 4 | 17                          |    | 17 |
| 6                           |    | 4  | 13                          |    | 7  | 8                     |    | 3 | 8                           |    | 16 |
| 10                          |    | 3  | 13                          |    | 5  | 9                     |    | 4 | 12                          |    | 12 |
| 7                           |    | 5  | 3                           |    | 11 | 8                     |    | 6 | 11                          |    | 20 |
| 10                          |    | 8  | 8                           |    | 13 | 5                     |    | 4 | 15                          |    | 15 |
| 15                          |    | 10 | 5                           |    | 14 | 6                     |    | 1 | 15                          |    | 15 |
| 13                          |    | 10 | 11                          |    | 10 | 6                     |    | 6 | 12                          |    | 10 |
| 8                           |    | 9  | 6                           |    | 11 | 8                     |    | 4 | 11                          |    | 10 |
| 8                           |    | 7  | 2                           |    | 13 | 5                     |    | 2 | 15                          |    | 20 |
| 8                           |    | 9  | 3                           |    | 13 | 6                     |    | 0 | 15                          |    | 22 |
| 9                           |    | 10 | 4                           |    | 15 | 6                     |    | 3 | 12                          |    | 17 |
| 8                           |    | 8  | 8                           |    | 13 | 8                     |    | 3 | 11                          |    | 16 |
| 8                           |    | 7  | 5                           |    | 15 | 4                     |    | 4 | 9                           |    | 19 |
| 7                           |    | 8  | 6                           |    | 14 | 3                     |    | 7 | 15                          |    | 15 |
| 10                          |    | 4  | 3                           |    | 13 | 3                     |    | 4 | 16                          |    | 14 |
| 13                          |    | 3  | 4                           |    | 12 | 2                     |    | 6 | 13                          |    | 15 |
| 12                          |    | 6  | 4                           |    | 13 | 4                     |    | 1 | 17                          |    | 14 |
| 8                           |    | 10 |                             |    | 13 | 6                     |    | 3 | 13                          |    | 17 |
| 5                           |    | 5  |                             |    | 13 | 4                     |    | 9 | 15                          |    | 14 |
| 5                           |    | 5  |                             |    | 17 | 4                     |    | 4 | 14                          |    | 17 |
| 7                           |    | 15 |                             |    | 1  |                       |    | 1 |                             |    | 15 |
| 1                           |    | 12 |                             |    | 1  |                       |    | 1 |                             |    | 17 |
|                             |    |    |                             |    | 1  |                       |    | 1 |                             |    | 18 |
|                             |    |    |                             |    | 2  |                       |    | 2 |                             |    | 18 |
|                             |    |    |                             |    | 5  |                       |    | 5 |                             |    | 20 |

Figure 5

| Figure 5-I                  |       | Figure 5-J                    |       | Figure 5-L                    |       | Figure 5-N                    |       |
|-----------------------------|-------|-------------------------------|-------|-------------------------------|-------|-------------------------------|-------|
| Number of MAG positive cell |       | Number of c-Jun positive cell |       | Relative protein level(5 div) |       | Relative protein level(8 div) |       |
| 5 div                       | 8 div | 5 div                         | 8 div | MAG                           | c-Jun | MAG                           | c-Jun |
|                             |       |                               |       |                               |       |                               |       |

| Con  | AA   | Con  | AA  |
|------|------|------|-----|
| 2712 | 1254 | 1273 | 798 |
| 2633 | 1517 | 934  | 910 |
| 2401 | 1356 | 1004 | 631 |
| 2538 | 1468 | 1142 | 657 |
| 2287 | 1341 | 1205 | 699 |
| 3003 | 1285 | 952  | 782 |
| 2489 | 1114 | 987  | 757 |
| 2175 | 1376 | 1065 | 951 |
| 2889 | 1448 | 963  | 873 |
| 2963 | 1326 | 1184 | 852 |
| 2582 | 1406 | 1082 | 789 |
| 2312 | 1518 | 1053 | 721 |
|      | 1472 | 710  |     |
|      |      | 779  |     |

| Con | AA  | Con | AA  |
|-----|-----|-----|-----|
| 46  | 126 | 201 | 209 |
| 25  | 110 | 180 | 250 |
| 30  | 100 | 160 | 280 |
| 37  | 112 | 183 | 225 |
| 29  | 131 | 214 | 248 |
| 26  | 103 | 153 | 263 |
| 43  | 108 | 168 | 279 |
| 31  | 126 | 174 | 208 |
| 48  | 118 | 164 | 225 |
| 23  | 108 | 200 | 238 |
| 35  | 129 | 205 | 285 |
| 33  | 103 | 166 | 276 |
| 31  | 98  | 158 | 216 |
| 97  |     | 194 |     |
| 111 |     |     |     |

| Con    | AA       | Con       | AA    |
|--------|----------|-----------|-------|
| 0.5892 | 0.210583 | 0.1032689 | 0.594 |
| 0.4472 | 0.124785 | 0.273946  | 0.397 |
| 0.6925 | 0.37814  | 0.052174  | 0.449 |

| Con     | AA      | Con | AA      |
|---------|---------|-----|---------|
| 1.3942  | 0.42784 | 0.8 | 0.92174 |
| 1.03298 | 0.69213 | 0.6 | 1.23954 |
| 1.24594 | 0.58721 | 0.7 | 1.17349 |

Figure 6

| Figure 6-Q                  |     |        |     |
|-----------------------------|-----|--------|-----|
| Number of ED1 positive cell |     |        |     |
| 5 dpi                       |     | 8 dpi  |     |
| Saline                      | AA  | Saline | AA  |
| 153                         | 197 | 107    | 163 |
| 148                         | 236 | 97     | 159 |
| 124                         | 218 | 119    | 177 |
| 196                         | 194 | 115    | 175 |
| 173                         | 202 | 103    | 156 |
| 131                         | 235 | 121    | 166 |
| 105                         | 226 | 91     | 149 |
| 118                         | 229 | 116    | 187 |
| 129                         | 246 | 94     | 168 |
| 143                         | 204 | 122    | 183 |
| 149                         | 196 | 104    | 148 |
| 138                         | 221 | 100    | 152 |
| 155                         | 217 | 108    | 171 |
| 138                         |     | 169    |     |
| 127                         |     | 174    |     |
|                             |     | 164    |     |

| Figure 6-R                         |    |        |    |
|------------------------------------|----|--------|----|
| Denatured myelin droplets per cell |    |        |    |
| 5 dpi                              |    | 8 dpi  |    |
| Saline                             | AA | Saline | AA |
| 1                                  | 3  | 1      | 4  |
| 2                                  | 2  | 1      | 2  |
| 1                                  | 2  | 2      | 2  |
| 1                                  | 1  | 2      | 5  |
| 1                                  | 4  | 0      | 1  |
| 3                                  | 5  | 1      | 1  |
| 1                                  | 1  | 1      | 2  |
| 1                                  | 3  | 2      | 1  |
| 1                                  | 3  | 1      | 1  |
| 1                                  | 4  | 2      | 1  |
| 2                                  | 2  | 0      | 2  |
| 1                                  | 1  | 2      | 3  |
| 1                                  | 3  | 1      | 3  |
| 3                                  | 4  | 2      | 5  |
| 1                                  | 1  | 1      | 1  |
| 1                                  | 3  | 1      | 2  |
| 1                                  | 3  | 1      | 2  |
| 3                                  | 5  | 1      | 4  |
| 1                                  | 2  | 1      | 4  |
| 1                                  | 1  | 1      | 3  |
| 1                                  | 3  | 2      | 2  |
| 2                                  | 3  | 1      | 3  |
| 1                                  | 4  | 2      | 5  |
| 1                                  | 4  | 0      | 1  |
| 1                                  | 2  | 2      | 2  |
| 1                                  | 4  | 1      | 5  |
| 1                                  | 1  | 1      | 1  |
| 1                                  | 3  | 1      | 2  |
| 1                                  | 5  | 2      | 4  |
| 3                                  | 1  | 0      | 2  |
| 1                                  | 3  | 1      | 1  |
| 1                                  | 5  | 2      | 1  |
| 2                                  | 2  | 0      | 1  |
| 1                                  | 4  | 2      | 2  |
| 2                                  | 1  | 1      | 4  |
| 1                                  | 2  | 1      | 1  |
| 2                                  | 4  | 1      | 1  |
| 1                                  | 1  | 1      | 1  |
| 1                                  | 2  | 2      | 2  |
| 1                                  | 2  | 1      | 2  |
| 3                                  | 1  | 2      | 1  |
| 1                                  | 2  | 1      | 3  |
| 1                                  | 3  | 2      | 2  |
| 3                                  | 4  | 0      | 2  |
| 1                                  | 4  | 2      | 5  |
| 1                                  | 3  | 1      | 1  |
| 1                                  | 2  | 1      | 2  |
| 1                                  | 1  | 2      | 3  |
| 1                                  | 5  | 2      | 3  |
| 1                                  | 2  | 2      | 2  |
| 1                                  | 1  | 2      | 1  |
| 1                                  | 3  | 0      | 1  |
| 1                                  | 4  | 1      | 4  |
| 1                                  | 2  | 2      | 1  |
| 1                                  | 1  | 1      | 1  |
| 3                                  | 3  | 1      | 4  |
| 1                                  | 4  | 1      | 2  |
| 1                                  | 2  | 1      | 2  |
| 1                                  | 2  | 1      | 1  |
| 1                                  | 1  | 2      | 1  |
| 2                                  | 1  | 2      | 2  |
| 1                                  | 1  | 1      | 1  |
| 1                                  | 3  | 2      | 2  |
| 3                                  | 4  | 1      | 1  |
| 1                                  | 1  | 1      | 2  |
| 2                                  | 4  | 2      | 1  |
| 1                                  | 4  | 1      | 3  |
| 1                                  | 5  | 2      | 1  |
| 1                                  | 1  | 1      | 2  |
| 1                                  | 3  | 1      | 1  |
| 1                                  | 3  | 0      | 4  |
| 2                                  | 4  | 1      | 3  |
| 1                                  | 1  | 1      | 2  |
| 2                                  | 2  | 1      | 4  |
| 1                                  | 1  | 2      | 3  |
| 1                                  | 1  | 1      | 2  |
| 3                                  | 4  | 1      | 1  |
| 1                                  | 5  | 1      | 3  |
| 1                                  | 3  | 1      | 2  |
| 1                                  | 2  | 1      | 4  |
| 1                                  | 1  | 2      | 3  |
| 3                                  | 3  | 1      | 2  |
| 1                                  | 1  | 2      | 2  |
| 3                                  | 4  | 1      | 1  |
| 1                                  | 5  | 1      | 3  |
| 1                                  | 3  | 1      | 2  |
| 1                                  | 2  | 1      | 4  |
| 2                                  | 2  | 1      | 2  |
| 1                                  | 3  | 2      | 2  |
| 1                                  | 2  | 0      | 5  |
| 1                                  | 2  | 1      | 4  |
| 4                                  | 1  | 1      | 2  |
| 3                                  | 1  | 1      | 2  |
| 1                                  | 1  | 1      | 3  |
| 3                                  |    | 2      | 3  |
| 3                                  |    | 5      | 3  |
| 2                                  |    | 1      | 1  |
| 1                                  |    | 2      | 1  |
| 3                                  |    | 1      | 3  |
| 1                                  |    | 1      | 2  |
| 3                                  |    | 2      | 2  |
| 2                                  |    | 2      | 2  |
| 4                                  |    | 2      | 2  |
| 1                                  |    | 1      | 3  |
| 3                                  |    | 5      | 3  |
| 2                                  |    | 1      | 2  |
| 1                                  |    | 2      | 1  |
| 3                                  |    | 1      | 3  |
| 3                                  |    | 2      | 2  |
| 2                                  |    | 2      | 2  |
| 4                                  |    | 2      | 2  |
| 1                                  |    | 1      | 3  |
| 3                                  |    | 5      | 3  |
| 2                                  |    | 1      | 2  |
| 1                                  |    | 2      | 1  |
| 3                                  |    | 1      | 3  |
| 1                                  |    | 1      | 2  |
| 3                                  |    | 2      | 2  |
| 2                                  |    | 2      | 2  |
| 4                                  |    | 2      | 2  |
| 1                                  |    | 1      | 3  |
| 3                                  |    | 5      | 3  |
| 2                                  |    | 1      | 2  |
| 1                                  |    | 2      | 1  |
| 3                                  |    | 1      | 3  |
| 1                                  |    | 1      | 2  |
| 3                                  |    | 2      | 2  |
| 2                                  |    | 2      | 2  |
| 4                                  |    | 2      | 2  |
| 1                                  |    | 1      | 3  |
| 3                                  |    | 5      | 3  |
| 2                                  |    | 1      | 2  |
| 1                                  |    | 2      | 1  |
| 3                                  |    | 1      | 3  |
| 1                                  |    | 1      | 2  |
| 3                                  |    | 2      | 2  |
| 2                                  |    | 2      | 2  |
| 4                                  |    | 2      | 2  |
| 1                                  |    | 1      | 3  |
| 3                                  |    | 5      | 3  |
| 2                                  |    | 1      | 2  |
| 1                                  |    | 2      | 1  |
| 3                                  |    | 1      | 3  |
| 1                                  |    | 1      | 2  |
| 3                                  |    | 2      | 2  |
| 2                                  |    | 2      | 2  |
| 4                                  |    | 2      | 2  |
| 1                                  |    | 1      | 3  |
| 3                                  |    | 5      | 3  |
| 2                                  |    | 1      | 2  |
| 1                                  |    | 2      | 1  |
| 3                                  |    | 1      | 3  |
| 1                                  |    | 1      | 2  |
| 3                                  |    | 2      | 2  |
| 2                                  |    | 2      | 2  |
| 4                                  |    | 2      | 2  |
| 1                                  |    | 1      | 3  |
| 3                                  |    | 5      | 3  |
| 2                                  |    | 1      | 2  |
| 1                                  |    | 2      | 1  |
| 3                                  |    | 1      | 3  |
| 1                                  |    | 1      | 2  |
| 3                                  |    | 2      | 2  |
| 2                                  |    | 2      | 2  |
| 4                                  |    | 2      | 2  |
| 1                                  |    | 1      | 3  |
| 3                                  |    | 5      | 3  |
| 2                                  |    | 1      | 2  |
| 1                                  |    | 2      | 1  |
| 3                                  |    | 1      | 3  |
| 1                                  |    | 1      | 2  |
| 3                                  |    | 2      | 2  |
| 2                                  |    | 2      | 2  |
| 4                                  |    | 2      | 2  |
| 1                                  |    | 1      | 3  |
| 3                                  |    | 5      | 3  |
| 2                                  |    | 1      | 2  |
| 1                                  |    | 2      | 1  |
| 3                                  |    | 1      | 3  |
| 1                                  |    | 1      | 2  |
| 3                                  |    | 2      | 2  |
| 2                                  |    | 2      | 2  |
| 4                                  |    | 2      | 2  |
| 1                                  |    | 1      | 3  |
| 3                                  |    | 5      | 3  |
| 2                                  |    | 1      | 2  |
| 1                                  |    | 2      | 1  |
| 3                                  |    | 1      | 3  |
| 1                                  |    | 1      | 2  |
| 3                                  |    | 2      | 2  |
| 2                                  |    | 2      | 2  |
| 4                                  |    | 2      | 2  |
| 1                                  |    | 1      | 3  |
| 3                                  |    | 5      | 3  |
| 2                                  |    | 1      | 2  |
| 1                                  |    | 2      | 1  |
| 3                                  |    | 1      | 3  |
| 1                                  |    | 1      | 2  |
| 3                                  |    | 2      | 2  |
| 2                                  |    | 2      | 2  |
| 4                                  |    | 2      | 2  |
| 1                                  |    | 1      | 3  |
| 3                                  |    | 5      | 3  |
| 2                                  |    | 1      | 2  |
| 1                                  |    | 2      | 1  |
| 3                                  |    | 1      | 3  |
| 1                                  |    | 1      | 2  |
| 3                                  |    | 2      | 2  |
| 2                                  |    | 2      | 2  |
| 4                                  |    | 2      | 2  |
| 1                                  |    | 1      | 3  |
| 3                                  |    | 5      | 3  |
| 2                                  |    | 1      | 2  |
| 1                                  |    | 2      | 1  |
| 3                                  |    | 1      | 3  |
| 1                                  |    | 1      | 2  |
| 3                                  |    | 2      | 2  |
| 2                                  |    | 2      | 2  |
| 4                                  |    | 2      | 2  |
| 1                                  |    | 1      | 3  |
| 3                                  |    | 5      | 3  |
| 2                                  |    | 1      | 2  |
| 1                                  |    | 2      | 1  |
| 3                                  |    | 1      | 3  |
| 1                                  |    | 1      | 2  |
| 3                                  |    | 2      | 2  |
| 2                                  |    | 2      | 2  |
| 4                                  |    | 2      | 2  |
| 1                                  |    | 1      | 3  |
| 3                                  |    | 5      | 3  |
| 2                                  |    | 1      | 2  |
| 1                                  |    | 2      | 1  |
| 3                                  |    | 1      | 3  |
| 1                                  |    | 1      | 2  |
| 3                                  |    | 2      | 2  |
| 2                                  |    | 2      | 2  |
| 4                                  |    | 2      | 2  |
| 1                                  |    | 1      | 3  |
| 3                                  |    | 5      | 3  |
| 2                                  |    | 1      | 2  |
| 1                                  |    | 2      | 1  |
| 3                                  |    | 1      | 3  |
| 1                                  |    | 1      | 2  |
| 3                                  |    | 2      | 2  |
| 2                                  |    | 2      | 2  |
| 4                                  |    | 2      | 2  |
| 1                                  |    | 1      | 3  |
| 3                                  |    | 5      | 3  |
| 2                                  |    | 1      | 2  |
| 1                                  |    | 2      | 1  |
| 3                                  |    | 1      | 3  |
| 1                                  |    | 1      | 2  |
| 3                                  |    | 2      | 2  |
| 2                                  |    | 2      | 2  |
| 4                                  |    | 2      | 2  |
| 1                                  |    | 1      | 3  |
| 3                                  |    | 5      | 3  |
| 2                                  |    | 1      | 2  |
| 1                                  |    | 2      | 1  |
| 3                                  |    | 1      | 3  |
| 1                                  |    | 1      | 2  |
| 3                                  |    | 2      | 2  |
| 2                                  |    | 2      | 2  |
| 4                                  |    | 2      | 2  |
| 1                                  |    | 1      | 3  |
| 3                                  |    | 5      | 3  |
| 2                                  |    | 1      | 2  |
| 1                                  |    | 2      | 1  |
| 3                                  |    | 1      | 3  |
| 1                                  |    | 1      | 2  |
| 3                                  |    | 2      | 2  |
| 2                                  |    | 2      | 2  |
| 4                                  |    | 2      | 2  |
| 1                                  |    | 1      | 3  |
| 3                                  |    | 5      | 3  |
| 2                                  |    | 1      | 2  |
| 1                                  |    | 2      | 1  |
| 3                                  |    | 1      | 3  |
| 1                                  |    | 1      | 2  |
| 3                                  |    | 2      | 2  |
| 2                                  |    | 2      | 2  |
| 4                                  |    | 2      | 2  |
| 1                                  |    | 1      | 3  |
| 3                                  |    | 5      | 3  |
| 2                                  |    | 1      | 2  |
| 1                                  |    | 2      | 1  |
| 3                                  |    | 1      | 3  |
| 1                                  |    | 1      | 2  |
| 3                                  |    | 2      | 2  |
| 2                                  |    | 2      | 2  |
| 4                                  |    | 2      | 2  |
| 1                                  |    | 1      | 3  |
| 3                                  |    | 5      | 3  |
| 2                                  |    | 1      | 2  |
| 1                                  |    | 2      | 1  |
| 3                                  |    | 1      | 3  |
| 1                                  |    | 1      | 2  |
| 3                                  |    | 2      | 2  |
| 2                                  |    | 2      | 2  |
| 4                                  |    | 2      | 2  |
| 1                                  |    | 1      | 3  |
| 3                                  |    | 5      | 3  |
| 2                                  |    | 1      | 2  |
| 1                                  |    | 2      | 1  |
| 3                                  |    | 1      | 3  |
| 1                                  |    | 1      | 2  |
| 3                                  |    | 2      | 2  |
| 2                                  |    | 2      | 2  |
| 4                                  |    | 2      | 2  |
| 1                                  |    | 1      | 3  |
| 3                                  |    | 5      | 3  |
| 2                                  |    | 1      | 2  |
| 1                                  |    | 2      | 1  |
| 3                                  |    | 1      | 3  |
| 1                                  |    | 1      | 2  |
| 3                                  |    | 2      | 2  |
| 2                                  |    | 2      | 2  |
| 4                                  |    | 2      | 2  |
| 1                                  |    | 1      | 3  |
| 3                                  |    | 5      | 3  |
| 2                                  |    | 1      | 2  |
| 1                                  |    | 2      | 1  |
| 3                                  |    | 1      | 3  |
| 1                                  |    | 1      | 2  |
| 3                                  |    | 2      | 2  |
| 2                                  |    | 2      | 2  |
| 4                                  |    | 2      | 2  |
| 1                                  |    | 1      | 3  |
| 3                                  |    | 5      | 3  |
| 2                                  |    | 1      | 2  |
| 1                                  |    | 2      | 1  |
| 3                                  |    | 1      | 3  |
| 1                                  |    | 1      | 2  |
| 3                                  |    | 2      | 2  |
| 2                                  |    | 2      | 2  |
| 4                                  |    | 2      | 2  |
| 1                                  |    | 1      | 3  |
| 3                                  |    | 5      | 3  |
| 2                                  |    | 1      | 2  |
| 1                                  |    | 2      | 1  |
| 3                                  |    | 1      | 3  |
| 1                                  |    | 1      | 2  |
| 3                                  |    | 2      | 2  |
| 2                                  |    | 2      | 2  |
| 4                                  |    | 2      | 2  |
| 1                                  |    | 1      | 3  |
| 3                                  |    | 5      | 3  |
| 2                                  |    | 1      | 2  |
| 1                                  |    | 2      | 1  |
| 3                                  |    | 1      | 3  |
| 1                                  |    | 1      | 2  |
| 3                                  |    | 2      | 2  |
| 2                                  |    | 2      | 2  |
| 4                                  |    | 2      | 2  |
| 1                                  |    |        |    |
